# Supplementary material for: Dysbiosis Signature of Fecal Microbiota in Colorectal Cancer Patients
Source: Springer Nature journal article supplement (doi:10.1007/s00248-013-0245-9), 2013-06-03
Supplement: 248_2013_245_MOESM1_ESM.pdf [file 248_2013_245_MOESM1_ESM.pdf]

## Supporting information

### Microbial Ecology

#### Dysbiosis signature of fecal microbiota in colorectal cancer patients

Na Wu · Xi Yang · Ruifen Zhang · Jun Li · Xue Xiao · Yongfei Hu · Yanfei Chen · Fengling Yang · Na Lu · Zhiyun Wang · Chunguang Luan · Yulan Liu ·

Baohong Wang · Charlie Xiang · Yuezhu Wang · Fangqing Zhao · George F. Gao · Shengyue Wang · Lanjuan Li · Haizeng Zhang (✉) · Baoli Zhu(✉)

(✉) Corresponding authors

Baoli Zhu

CAS Key Laboratory of Pathogenic Microbiology and Immunology, Institute of Microbiology, Chinese Academy of Sciences, Beijing 100101, China

e-mail: [zhubaoli@im.ac.cn](mailto:zhubaoli@im.ac.cn)

Haizeng Zhang

Cancer Institute and Hospital, Chinese Academy of Medical Sciences, Beijing 100021, China

e-mail: [haizengzhang@163.com](mailto:haizengzhang@163.com)

**Table S1** Clinical data of CRC patients

| Patient ID | Sex(M/F) | Age  | Weight | Height | BMI  | Tumor location   | FOBT | Tumor classification | Histology | Changes in bowel habits | Tumor size (cm×cm×cm) |
|------------|----------|------|--------|--------|------|------------------|------|----------------------|-----------|-------------------------|-----------------------|
| C1         | M        | 61   | 60     | 1.63   | 22.6 | Rectum           | P    | T4N1M0               | Mod.      | No                      | 4×3×2                 |
| C3         | F        | 59   | 54     | 1.58   | 21.6 | Ascending colon  | P    | T4NXM1               | N/A       | No                      | 10×7×6                |
| C4         | M        | 64   | 70     | 1.71   | 23.9 | Rectum           | P    | T3N1M0               | Hig.      | No                      | 3.5×3×0.8             |
| C5         | F        | 60   | 58     | 1.56   | 23.8 | Rectum           | N    | TisN0M0              | Adenoma   | No                      | 1×1×1                 |
| C6         | F        | 50   | 65     | 1.62   | 24.8 | Sigmoid colon    | N    | T4N1M0               | Mod.      | Yes                     | 3.5×5×0.5             |
| C7         | M        | 54   | 72     | 1.68   | 25.5 | Rectum           | P    | T3N1M0               | Mod.      | No                      | 8.5×4.8×1.5           |
| C8         | M        | 50   | 78     | 1.71   | 26.7 | Rectum           | P    | T3N2M0               | Mod.      | No                      | 4×4×1.2               |
| C9         | F        | 51   | 67     | 1.62   | 25.5 | Sigmoid colon    | P    | T4N0M0               | Mod.      | No                      | 4.5×3.5×1.2           |
| C10        | F        | 45   | 50     | 1.60   | 19.5 | Rectum           | N    | T2N1M0               | Mod.      | No                      | 3×2.5×1.0             |
| C11        | M        | 48   | 67     | 1.73   | 22.4 | Sigmoid colon    | P    | T3N1M0               | Mod.      | Yes                     | 3×1.5×0.7             |
| C12        | F        | 61   | 69     | 1.51   | 30.3 | Rectum           | N    | T2N2M0               | Mod.      | Yes                     | 4×2.5×1               |
| C13        | M        | 72   | 68     | 1.76   | 22.0 | Rectum           | P    | T3N1M0               | Mod.      | No                      | 4×4×1                 |
| C14        | M        | 56   | 67     | 1.60   | 26.2 | Ascending colon  | P    | T3N0M0               | Mod.      | No                      | 5×6.5×1.5             |
| C15        | M        | 64   | 70     | 1.69   | 24.5 | Rectum           | P    | T4NXM0               | Mod.      | No                      | 10×10×10              |
| C16        | F        | 70   | 50     | 1.47   | 23.1 | Rectum           | P    | T3N1M0               | Mod.      | No                      | 4×3×0.9               |
| C17        | M        | 43   | 71     | 1.71   | 24.3 | Transverse colon | P    | TisN0M0              | Adenoma   | No                      | 4×4.2×1.5             |
| C18        | M        | 66   | 75     | 1.72   | 25.4 | Ascending colon  | P    | T3N1M0               | Mod.      | Yes                     | 8×6×3.5               |
| C19        | F        | 58   | 49     | 1.49   | 22.1 | Rectum           | P    | T4N1M0               | Mod.      | No                      | 4×5×1.4               |
| C20        | F        | 76   | 55     | 1.47   | 25.5 | Sigmoid colon    | N    | T4N0M0               | Mod.      | No                      | 3.5×3.5×0.8           |
| Mean       | 11/9     | 58.3 |        |        | 24.8 |                  |      |                      |           |                         |                       |
| SD         |          | 8.7  |        |        | 3.3  |                  |      |                      |           |                         |                       |

*M* male, *F* female, *BMI* body mass index, *FOBT* annual fecal occult blood testing,  
*Mod.* moderately differentiated adenocarcinoma, *Hig.* highly differentiated adenocarcinoma,  
*N/A* Not Available, *SD* Standard Deviation

**Table S2** Characteristics of healthy subjects

| ID   | Sex(M/F) | Age  | Weight | Height | BMI  |
|------|----------|------|--------|--------|------|
| H21  | F        | 59   | 60     | 1.62   | 22.9 |
| H22  | F        | 49   | 62     | 1.58   | 24.8 |
| H23  | M        | 45   | 65     | 1.60   | 25.4 |
| H24  | F        | 49   | 60     | 1.63   | 22.6 |
| H25  | F        | 46   | 55     | 1.56   | 22.6 |
| H26  | F        | 53   | 65     | 1.57   | 26.4 |
| H27  | M        | 55   | 75     | 1.70   | 26.0 |
| H28  | M        | 62   | 70     | 1.68   | 24.8 |
| H29  | F        | 56   | 50     | 1.58   | 20.0 |
| H30  | M        | 51   | 60     | 1.70   | 20.8 |
| H31  | F        | 58   | 75     | 1.67   | 26.9 |
| H32  | F        | 41   | 45     | 1.54   | 19.0 |
| H33  | F        | 57   | 52     | 1.57   | 21.1 |
| H34  | M        | 50   | 62     | 1.75   | 20.2 |
| H35  | M        | 59   | 65     | 1.65   | 23.9 |
| H36  | M        | 54   | 64     | 1.62   | 24.4 |
| H37  | M        | 59   | 93     | 1.71   | 31.8 |
| H38  | M        | 55   | 69     | 1.72   | 23.3 |
| H39  | M        | 52   | 70     | 1.70   | 24.2 |
| H40  | M        | 54   | 85     | 1.75   | 27.8 |
| Mean | 11/9     | 53.2 |        |        | 23.9 |
| SD   |          | 5.4  |        |        | 3.0  |

*M* male, *F* female, *BMI* body mass index, *SD* Standard Deviation

**Table S3** Pyrosequencing data of each subject

| CRC patients (n=19) |               |      |                     |                            |          | Healthy subjects (n=20) |               |      |                     |                            |          |
|---------------------|---------------|------|---------------------|----------------------------|----------|-------------------------|---------------|------|---------------------|----------------------------|----------|
| ID                  | No. sequences | OTU  | Chao 1 <sup>a</sup> | Shannon index <sup>b</sup> | Coverage | ID                      | No. sequences | OTU  | Chao 1 <sup>a</sup> | Shannon index <sup>b</sup> | Coverage |
| C1                  | 10772         | 1617 | 3423.728            | 5.631                      | 0.914    | H21                     | 28493         | 2347 | 4169.196            | 5.169                      | 0.959    |
| C3                  | 25579         | 2981 | 5463.266            | 5.752                      | 0.939    | H22                     | 9719          | 915  | 1575.640            | 4.220                      | 0.952    |
| C4                  | 18687         | 1938 | 3433.564            | 5.515                      | 0.947    | H23                     | 16155         | 1974 | 3617.265            | 5.379                      | 0.936    |
| C5                  | 18182         | 2035 | 3447.886            | 5.726                      | 0.946    | H24                     | 10438         | 1520 | 2959.444            | 5.280                      | 0.917    |
| C6                  | 29140         | 3387 | 6034.577            | 5.990                      | 0.940    | H25                     | 8133          | 1231 | 2406.330            | 5.339                      | 0.916    |
| C7                  | 23257         | 2038 | 3381.213            | 5.276                      | 0.958    | H26                     | 16362         | 2356 | 4485.512            | 5.646                      | 0.922    |
| C8                  | 18717         | 1412 | 2384.046            | 4.422                      | 0.965    | H27                     | 13985         | 1540 | 2797.446            | 4.827                      | 0.941    |
| C9                  | 11079         | 1575 | 3062.265            | 5.497                      | 0.922    | H28                     | 21898         | 2597 | 5362.264            | 5.667                      | 0.934    |
| C10                 | 18431         | 2321 | 4453.877            | 5.620                      | 0.933    | H29                     | 14309         | 1068 | 1865.882            | 4.774                      | 0.966    |
| C11                 | 23107         | 2325 | 4307.970            | 5.731                      | 0.948    | H30                     | 20555         | 2405 | 4638.896            | 5.782                      | 0.938    |
| C12                 | 22167         | 2034 | 3691.285            | 5.368                      | 0.955    | H31                     | 22231         | 2875 | 5087.718            | 5.827                      | 0.934    |
| C13                 | 16249         | 1388 | 2475.154            | 5.054                      | 0.959    | H32                     | 24641         | 1724 | 3102.860            | 4.504                      | 0.966    |
| C14                 | 38327         | 3138 | 5280.054            | 5.666                      | 0.962    | H33                     | 17084         | 1647 | 3231.711            | 4.733                      | 0.950    |
| C15                 | 15594         | 1720 | 2897.941            | 5.463                      | 0.949    | H34                     | 17710         | 2128 | 3833.648            | 5.598                      | 0.936    |
| C16                 | 28937         | 2468 | 3981.400            | 5.530                      | 0.961    | H35                     | 16000         | 1594 | 3105.332            | 5.116                      | 0.947    |
| C17                 | 19300         | 2225 | 4204.877            | 5.687                      | 0.938    | H36                     | 21396         | 1973 | 3616.694            | 4.781                      | 0.953    |
| C18                 | 16598         | 1991 | 3669.221            | 5.531                      | 0.938    | H37                     | 15212         | 1822 | 3174.042            | 5.189                      | 0.938    |
| C19                 | 23111         | 3333 | 6548.897            | 6.383                      | 0.923    | H38                     | 12324         | 1717 | 3118.399            | 5.342                      | 0.925    |
| C20                 | 9191          | 1637 | 3127.146            | 5.791                      | 0.901    | H39                     | 19523         | 2265 | 4091.760            | 5.533                      | 0.940    |
|                     |               |      |                     |                            |          | H40                     | 9773          | 1041 | 1842.057            | 4.830                      | 0.946    |
| mean                | 20338         | 2188 | 3961.493            | 5.560                      | 0.942    | mean                    | 16797         | 1837 | 3404.105            | 5.177                      | 0.941    |
| SD                  | 7068          | 610  | 1156.351            | 0.390                      | 0.017    | SD                      | 5382          | 541  | 1045.076            | 0.447                      | 0.014    |

<sup>a</sup> Chao1 indicated the bacterial richness

<sup>b</sup> Shannon index indicated the bacterial diversity

*CRC* colorectal cancer, *OTU* operational taxonomic units, *SD* standard deviation

**Table S4** Species of *Fusobacterium*

| Patient ID | Score | Similarity (100%) | E-value  | Best BLAST hit against species in greengenes database |
|------------|-------|-------------------|----------|-------------------------------------------------------|
| C1         | 278   | 100               | 5.00E-74 | <i>Fusobacterium periodonticum</i>                    |
|            | 268   | 99.28             | 5.00E-71 | <i>Fusobacterium nucleatum</i>                        |
| C2         | 276   | 100               | 2.00E-73 | <i>Fusobacterium nucleatum</i>                        |
| C3         | 278   | 100               | 5.00E-74 | <i>Fusobacterium periodonticum</i>                    |
|            | 268   | 99.28             | 5.00E-71 | <i>Fusobacterium nucleatum</i>                        |
|            | 224   | 96.35             | 6.00E-58 | <i>Fusobacterium nucleatum subsp. nucleatum</i>       |
| C4         | 278   | 100               | 5.00E-74 | <i>Fusobacterium nucleatum</i>                        |
|            | 278   | 100               | 5.00E-74 | <i>Fusobacterium periodonticum</i>                    |
| C5         | 276   | 100               | 2.00E-73 | <i>Fusobacterium necrophorum</i>                      |
|            | 252   | 97.84             | 3.00E-66 | <i>Fusobacterium nucleatum</i>                        |
|            | 246   | 97.14             | 2.00E-64 | <i>Fusobacterium periodonticum</i>                    |
| C6         | 278   | 100               | 5.00E-74 | <i>Fusobacterium periodonticum</i>                    |
|            | 266   | 99.28             | 2.00E-70 | <i>Fusobacterium nucleatum</i>                        |
| C7         | 280   | 100               | 1.00E-74 | <i>Fusobacterium nucleatum</i>                        |
|            | 268   | 100               | 5.00E-71 | <i>Fusobacterium periodonticum</i>                    |
|            | 268   | 99.28             | 5.00E-71 | <i>Fusobacterium nucleatum subsp. vincentii</i>       |
|            | 240   | 97.16             | 1.00E-62 | <i>Fusobacterium nucleatum subsp. nucleatum</i>       |
| C8         | 278   | 100               | 5.00E-74 | <i>Fusobacterium nucleatum</i>                        |
| C12        | 278   | 100               | 5.00E-74 | <i>Fusobacterium nucleatum</i>                        |
|            | 264   | 100               | 7.00E-70 | <i>Fusobacterium ulcerans</i>                         |
|            | 272   | 99.29             | 3.00E-72 | <i>Fusobacterium varium</i>                           |



|     |     |       |          |                                                 |
|-----|-----|-------|----------|-------------------------------------------------|
| C13 | 278 | 100   | 5.00E-74 | <i>Fusobacterium nucleatum</i>                  |
|     | 278 | 100   | 5.00E-74 | <i>Fusobacterium nucleatum subsp. nucleatum</i> |
|     | 272 | 100   | 3.00E-72 | <i>Fusobacterium periodonticum</i>              |
| C14 | 264 | 100   | 7.00E-70 | <i>Fusobacterium gonidiaformans</i>             |
|     | 276 | 100   | 2.00E-73 | <i>Fusobacterium nucleatum</i>                  |
|     | 276 | 100   | 2.00E-73 | <i>Fusobacterium periodonticum</i>              |
|     | 272 | 100   | 3.00E-72 | <i>Fusobacterium sp. 3_1_5R</i>                 |
|     | 270 | 99.29 | 1.00E-71 | <i>Fusobacterium nucleatum subsp. vincentii</i> |
|     | 240 | 97.74 | 1.00E-62 | <i>Fusobacterium russii</i>                     |
| C15 | 216 | 96.35 | 2.00E-55 | <i>Fusobacterium gonidiaformans</i>             |
| C16 | 264 | 100   | 7.00E-70 | <i>Fusobacterium ulcerans</i>                   |
|     | 236 | 97.12 | 2.00E-61 | <i>Fusobacterium varium</i>                     |
| C18 | 266 | 99.28 | 2.00E-70 | <i>Fusobacterium nucleatum</i>                  |
| C19 | 264 | 100   | 7.00E-70 | <i>Fusobacterium mortiferum</i>                 |
|     | 278 | 100   | 5.00E-74 | <i>Fusobacterium periodonticum</i>              |
|     | 260 | 99.26 | 1.00E-68 | <i>Fusobacterium nucleatum</i>                  |
|     | 248 | 98.58 | 4.00E-65 | <i>Fusobacterium ulcerans</i>                   |
| H29 | 250 | 100   | 1.00E-65 | <i>Fusobacterium mortiferum</i>                 |
|     | 272 | 99.29 | 3.00E-72 | <i>Fusobacterium mortiferum</i>                 |
| H37 | 264 | 100   | 7.00E-70 | <i>Fusobacterium ulcerans</i>                   |
|     | 268 | 99.28 | 5.00E-71 | <i>Fusobacterium mortiferum</i>                 |
